# Supplementary material for: Separation of thorium ions from wolframite and scandium concentrates using graphene oxide
Source: Royal Society of Chemistry journal article supplement (doi:10.1039/c5cp04384k), 2015-01-01
Supplement: c5cp04384k1.pdf [file c5cp04384k1.pdf]

## SUPPORTING INFORMATION

Received 00th January 20xx,  
Accepted 00th January 20xx

DOI: 10.1039/x0xx00000x

www.rsc.org/

### Separation of thorium ions from wolframite and scandium concentrates using graphene oxide

Ondřej Jankovský<sup>a</sup>, David Sedmidubský<sup>a</sup>, Petr Šímek<sup>a</sup>, Kateřina Klímová<sup>a</sup>, Daniel Bouša<sup>a</sup>, Chris Boothroyd<sup>b</sup>, Anna Macková<sup>c,d</sup> and Zdeněk Sofer<sup>\*a</sup>

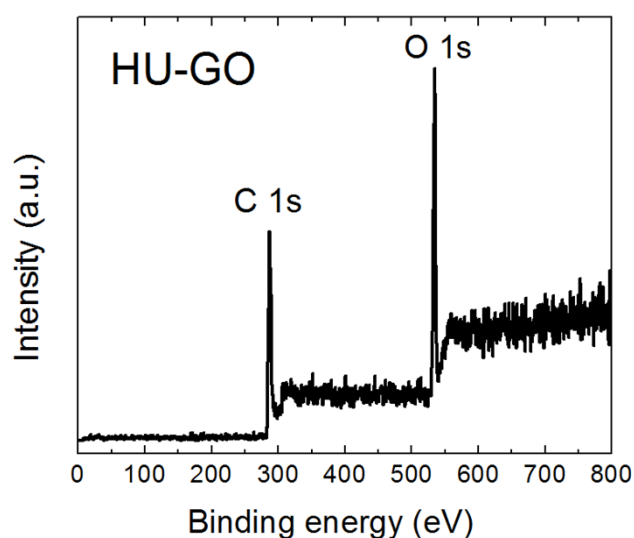

Figure S11 XPS survey spectrum of the starting graphene oxide.

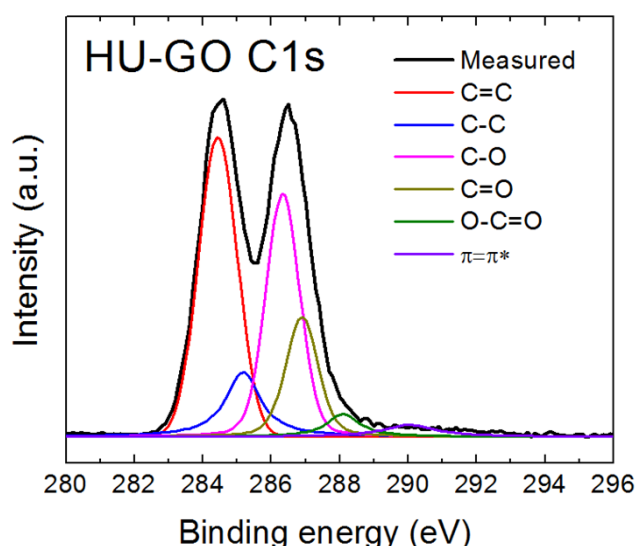

Figure S12 The high-resolution XPS spectrum of C1s peak from the starting graphene oxide.

Table S11. Results of C1s fitting for the starting graphene oxide.

| Sample | -C=C  | C-C   | C-O   | C=O   | O-C=O | $\pi=\pi^*$ |
|--------|-------|-------|-------|-------|-------|-------------|
| HU-GO  | 38.86 | 10.63 | 29.54 | 14.58 | 3.53  | 2.858       |

<sup>a</sup> Department of Inorganic Chemistry, University of Chemistry and Technology Prague, 166 28 Prague 6, Czech Republic. E-mail: zdenek.sofer@vscht.cz; Fax: +420 22431-0422

<sup>b</sup> Ernst Ruska-Centrum und Peter Grünberg Institut, Forschungszentrum Jülich, 52425 Jülich, Germany

<sup>c</sup> Institute of Nuclear Physics AS CR, v.v.i., Husinec - Řež, 130, 250 68 Řež, Czech Republic

<sup>d</sup> Department of Physics, Faculty of Science, J.E. Purkinje University, Ceske mladeze 8, 400 96 Usti nad Labem, Czech Republic

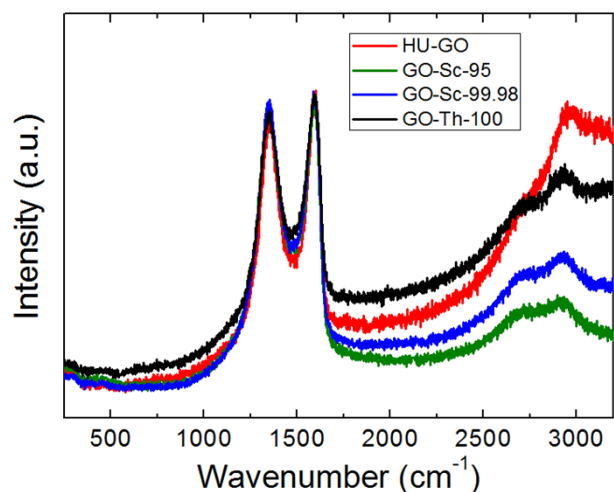

**Figure S13** Raman spectra of the starting graphene oxide and Th and/or Sc doped graphene oxides.

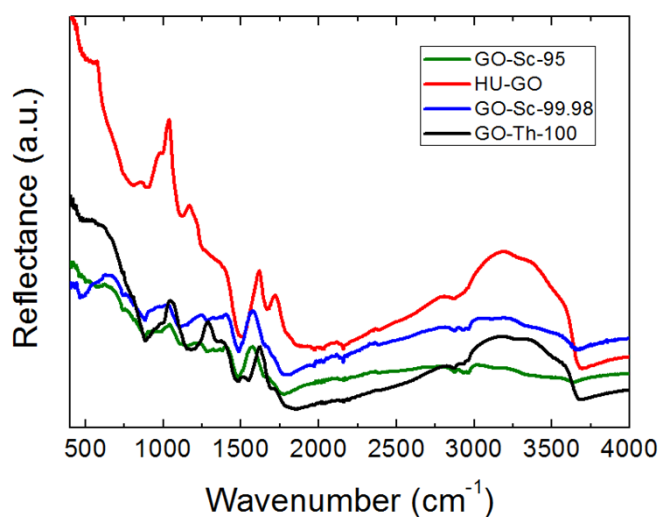

**Figure S14** FT-IR spectra of the starting graphene oxide and Th and/or Sc doped graphene oxides.

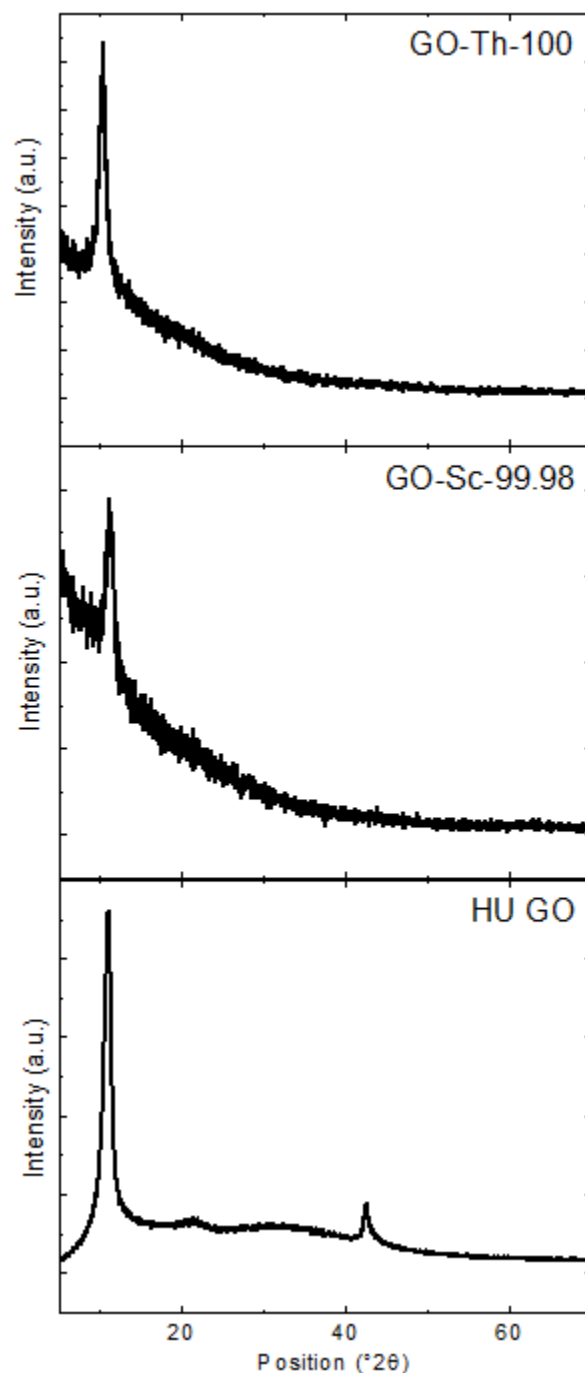

**Figure S15** X-ray diffractogram of the starting graphene oxide and Th and/or Sc doped graphene oxides.
